# Supplementary material for: Toward rational catalyst design for partial hydrogenation of dimethyl oxalate to methyl glycolate: a descriptor-based microkinetic analysis
Source: Royal Society of Chemistry journal article supplement (doi:10.1039/c9cy01198f), 2019-01-01
Supplement: c9cy01198f1.pdf [file c9cy01198f1.pdf]

## Supporting Information

### **Toward rational catalyst design for Partial Hydrogenation of Dimethyl Oxalate to Methyl Glycolate: A Descriptor-Based Microkinetic Analysis**

Wei-Qi Yan, Jun-Bo Zhang, Ling Xiao, Yi-An Zhu,\* Yue-Qiang Cao, Jing-Hong Zhou,\* Zhi-Jun Sui, Wei Li, and Xing-Gui Zhou

United Chemical Reaction Engineering Research Institute (UNILAB), State Key Laboratory of Chemical Engineering, East China University of Science and Technology, Shanghai, 200237, China

\*Corresponding authors: [yanzhu@ecust.edu.cn](mailto:yanzhu@ecust.edu.cn) (Yi-An Zhu) and [jhzhou@ecust.edu.cn](mailto:jhzhou@ecust.edu.cn) (Jing-Hong Zhou)

## S.1 Linear transition state energy scaling relations

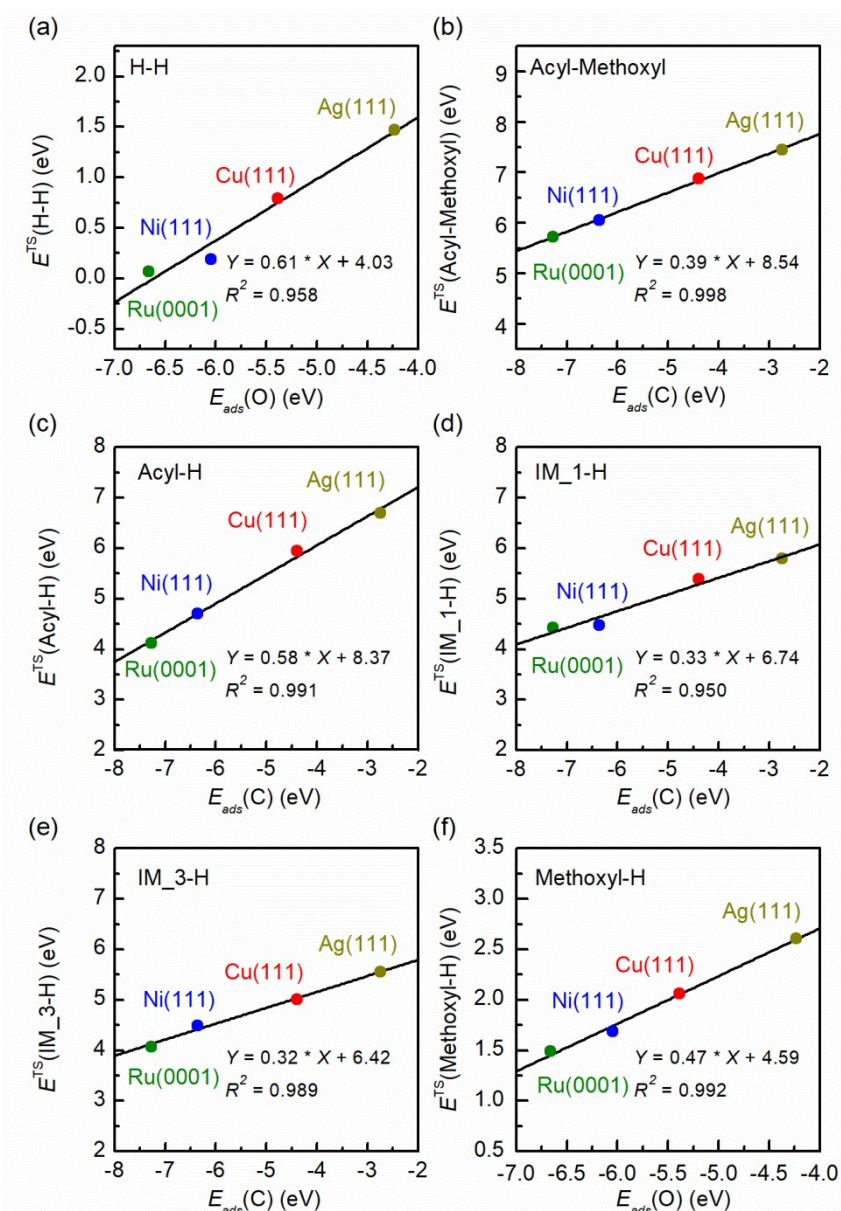

**Fig S1.** Linear transition state energy scaling relations for the dissociation of (a) H<sub>2</sub> and (b) DMO and the hydrogenation of (c) acyl, (d) IM<sub>1</sub>, (e) IM<sub>3</sub>, and (f) methoxyl.

## S.2 Microkinetic Modelling

The microkinetic model is constructed under the mean-field approximation. Rate expressions have the form:

$$r_i = (k_{f,i} \prod_{j \in P_{IS}} P_j \prod_{\theta \in \theta_{IS}} \theta_j) - (k_{r,i} \prod_{j \in P_{FS}} P_j \prod_{\theta \in \theta_{FS}} \theta_j) \quad (1)$$

where  $r_i$  is the rate of elementary step  $i$ ,  $P_{IS/FS}$  are the gas pressures in the initial/final state of step  $i$ , and  $\theta_{IS/FS}$  are the coverages of intermediates in the initial/final state of step  $i$ . The coverages are normalized such that the sum of all coverages for each type of adsorption site is constrained to unity.

The reaction rate constants  $k_{f/r,i}$  are computed using transition-state theory:

$$k_{f,i} = \frac{k_{BT}}{h} \exp\left(\frac{-\Delta G_{act,i}}{k_B T}\right) \quad (2)$$

$$k_{r,i} = \frac{k_B T}{h} \exp\left(\frac{-(\Delta G_{act,i} - \Delta G_{rxn,i})}{k_B T}\right) \quad (3)$$

where  $\Delta G_{act,i} = G_{TS} - G_{IS}$ ,  $\Delta G_{rxn,i} = G_{FS} - G_{IS}$ ,  $k_B$  and  $h$  are Boltzmann's and Planck's constants, respectively, and  $T$  is the temperature in Kelvin.  $G_{IS}$ ,  $G_{FS}$  and  $G_{TS}$  are the Gibbs free energies of the initial, final, and transition states, respectively. Gibbs free energies are computed as the DFT formation energy plus a thermodynamic correction.

The rate expressions are used to determine the rate of change for all coverages as follows:

$$\frac{d\theta_j}{dt} = \sum_{n \in r_{FS}} s_n r_n - \sum_{n \in r_{IS}} s_n r_n \quad (4)$$

where  $t$  is time,  $r_{IS/FS}$  is the set of reactions where intermediate  $j$  appears in the initial/final state, and  $s_n$  is the stoichiometry of intermediate  $j$  in reaction  $n$ .

The Gibbs free energy of gas-phase species A [DMO(g), MG(g), H<sub>2</sub>(g), CH<sub>3</sub>OH(g)] at temperature  $T$  and pressure  $P$  is given by

$$G_A(T, P) = E_{total,A} + E_{ZPE} + \Delta H^\circ(0 \rightarrow T) - TS(T, P)$$

$$= E_{total,A} + E_{ZPE} + \Delta H^\circ(0 \rightarrow T) - TS^\circ(T) + RT \ln\left(\frac{P}{P^\circ}\right) \quad (5)$$

where  $E_{total,A}$  is the total energy determined by DFT calculations.  $E_{ZPE}$  is the zero-point energy, which is calculated by

$$E_{ZPE} = \sum_{i=1}^{3N-6(5)} \frac{N_A h \nu_i}{2} \quad (6)$$

where  $N_A$  is Avogadro's number,  $h$  is Plank's constant,  $\nu_i$  is the frequency of the normal mode, and  $N$  is the number of atoms involved in the system.  $\Delta H^\circ(0 \rightarrow T)$  is the enthalpy change, which is assumed to be zero.  $S^\circ(T)$  is the entropy changer per degree, which is assumed to be 0.00135 eV/K for hydrogen gas and 0.002 eV/K for other gases.

The Gibbs free energy for a species A adsorbed on Ni surface is calculated as

$$G_A(T, P) = E_{total,A} + E_{ZPE} + \Delta U^\circ(0 \rightarrow T) - TS^\circ(T) \quad (7)$$

where the enthalpy change is replaced by the change of internal energy.

The standard internal energy change of adsorption is calculated by

$$\Delta U^\circ(0 \rightarrow T) = \sum_{i=1}^{3N} \frac{N_A h \nu_i e^{-h\nu_i/k_B T}}{1 - e^{-h\nu_i/k_B T}} \quad (8)$$

The standard entropy change ( $\Delta S^\circ$ ) of adsorption is calculated by

$$S^\circ(T) = S_{vib}^\circ(T) = \sum_{i=1}^{3N} \left[ -R \ln\left(1 - e^{-h\nu_i/k_B T}\right) + \frac{N_A h \nu_i}{T} \frac{e^{-h\nu_i/k_B T}}{\left(1 - e^{-h\nu_i/k_B T}\right)} \right] \quad (9)$$
